# Supplementary material
Source: ML conference proceedings conference paper supplement (https://aclanthology.org/K19-1008)
Supplement: Supplementary_Material [file learners-annotations-sample.xlsx]

## Sheet: learners-annotations-sample
sentence	original	annotation	annotation conf	usage class
Even if I agree with the statment, I think also that the present is important too and is unusefull try to do something new without know how to do well what we just know.	something	something	1	MIXED
In my opinion , it is alright to take a risk in doing something , but one has to be sane enough to not underestimate the effects of the risk .	something	something	0.8027	MIXED
Lety bring the chicken sandwiches and if you can bring something more to be great.	something	something	0.7936	CD
He was very old and didn't speak anything, just stayed looking us.	anything	anything	0.8	DN
an good advertisement can make a good products. First of all, I thing this statement is something very common to listen nowadays, but I think it isn't true.	something	something	1	MIXED
I worked there about five months and I could take or so a week as vacation, I never took it because I was always doing something to my second manager, others can make whatever they want but not I.	something	something	0.7995	MIXED
Do you know someone who has been a victim of any kind of harassment at their workplace?	someone	anyone	1	QU
About relationships, men can do everything they want and nobody says nothing, but if a woman do something that people think isn't so good everybody says that girl is not a right girl.	something	something	0.601	CD
If yes, could you please tell me anything about how it happened? Do you think that discrimination is correctly punished by our laws?	anything	something	0.8	QU
I have never heard something like that in my country and I think is due to the regular inspections which have to be made because of laws.	something	anything	0.8	DN
Young people are continually expecting something of extarordinary happens to make them happier, but without knowing nor themselves what this extraordinary means.	something	something	0.8033	MIXED
Has your employer even given someone with less experience and knowledge the promotion you were supposed to get, because you asked for maternity leave?	someone	someone	1	QU
I dont feel anything when I hear the song and I dont know: Am I happy or sad when I hear it?	anything	anything	1	MIXED
Claire said we have about 200 new costumers *Patricia asked if anyone of another country is coming to replace the Zach place in our company.	anyone	someone	0.5835	CD
Hi, can you buy something to me? I want some bread, three apples, some grapes, one chiken, some beef, a can of peas, a bttole of orange juice, Thanks!	something	something	0.8116	QU
I have always believed in you, and I'm sure you're going to be something huge in the future.	something	something	1	MIXED
Even if anyone deserve to have a private life, famous people know and might have made a mistake. . .	anyone	someone	0.5956	CD
If they try something new and hope that it becomes successful then the faith that they put in thier new idea (ex.	something	something	0.8	CD
It was new kind but i have never taste something like this.	something	anything	1	DN
All the facts that we've seen could be manipulated if someone tried to.	someone	someone	0.8085	CD
Do you Know something about " the sex discrimination Act 175"?	something	anything	1	QU
the people who only doing what they already know how to do well cannot easily catch up with those people who try to do something new and their great-great success rather than great or just success.	something	something	1	MIXED
Dear Jack I will retire in 2027 and tell you what I want to tell today have never experienced anything until then.	anything	anything	1	DN
I will need someone reliable that can help me, If I do not find this person, I would leave my job.	someone	someone	1	MIXED
It is because he take risks and moreover try something unique and now he is a successful man.	something	something	1	MIXED
Firstly, I will not receive any compension if something accidents happend, so I would be better to buy the insurance befroe I take the adventure.	something	something	0.407	CD
If you go to visit someone, please remember bring a small gift.	someone	someone	0.7953	CD
Taylor said that we didn't think anything except increading our sales.	anything	anything	1	DN
c. The meeting room will reopen to others if someone book the meeting room, and does not start meeting more than 10 mins Action items: a.	someone	anyone	0.7948	CD
Action items: Filipe said that we need to find anyone to make the adaptations and how many days this person is going to the clinical.	anyone	someone	1	MIXED
It is a great feeling to be able to give to somone something so important - education.	something	something	1	MIXED
I really upset, but I can't do anything to recover my ID.	anything	anything	1	DN
The first time, I was going down the stairs when I felt a push and I fell down the stairs, But did not have anyone behind me.	anyone	anyone	1	MIXED
Do you do something so that there is less discrimination?	something	anything	0.5959	QU
I have been client of their for 6 years and I haven't broken or damaged anything during that time.	anything	anything	1	DN
If someone loose their weight, their body can be slim and their face can be sharp.	someone	someone	1	CD
Other important point that I explaines was about the culture, economy and ou lifestyle, this was really impressive for all the students because they didn't know absolutely anything about it.	anything	anything	1	DN
Last month my friends accidentally saw that someone break into they neighbors house, but thief didn't see them.	someone	someone	1	MIXED
Welcome to my house Let's see my house This is a sitting room and this is my kitchen if you want eat something you must feel free.	something	anything	0.7914	CD
I will not recomand to anyone who want to trave in a group in South Asia and China. Why, you may wonder, should we purchase items according to advertisements?	anyone	someone	0.5947	DN
In addition, specializing in one specific subject helps you to focus in something that you like making you happy!!	something	something	0.8	MIXED
Selfish attitude has become prevalent in the Indian society these days, where you don't care for anyone else but for yourself.	anyone	anyone	1	DN
So I always try to see the price of the products on the Internet first before acquire something there.	something	something	0.6022	MIXED
She asked me, if I know someone who want to sell a beautiful small house which is in good condition.	someone	anyone	1	CD
In the Amazon, nowadays there are a lot of birds, fishes, tigers, aligators, snakes, ants and other little insects that live in the forest who too have differents trees and vegetables that someone don't have scientific name and the world do not known yet.	someone	other	0.5964	MIXED
Well, he disappeared last month and nobody knew anything about him, or where was he.	anything	anything	1	DN
So this kind of people are likely to loose their jobs as their knowledge can't help anything.	anything	anything	1	DN
They were so pour that somitimes they hardly had something to eat.	something	anything	1	DN
If you buy something which promise a good result, you may be disappointed.	something	something	0.8006	CD
But the drawback is that to be specialized someone should study more than the others.	someone	someone	1	MIXED
For example, you have to be cautious if you want to buy something on the internet by your credit card.	something	something	0.5959	CD
Bring a small gift to say thank you is very polite but if you do not bring anything is not considered impoilite.	anything	anything	0.6	DN
I believe that if you keep doing the same thing all the time, you feel comfortable and confident what you are doing but you do not gain anything much.	anything	anything	1	DN
How could he study medicine and something else which needs him to know its history ?	something	anything	0.8196	QU
Please say " Please" if you want someone help me.	someone	someone	0.6043	CD
When humans just borned in antient times, there weren't anything but people studied themself and inovent many things so we are now.	anything	anything	1	MIXED
This of course does not mean that taking up photography and biology will make you a better person than someone who knows Plato's "Republic" by heart, or has studied French for all his life.	someone	someone	0.6044	CP
Actually I should write what the presenter could have done differently, but I can't find anything.	anything	anything	1	DN
Therefore I cannot totally agree with this statement. I agree with the statement because I think that if you only do what you know and even if you are very good at it you will not learn anything new from it.	anything	anything	0.7957	DN
It's obligated a heavy fine or even a punishment when someone pass over the rules.	someone	someone	0.5867	MIXED
The party will have a chicken sandwiches, for drink, water and wine, if someone wants beers, tell me until on sunday.	someone	anyone	0.7979	CD
Do you know someone who returned to work after maternity leave and was demoted?	someone	anyone	1	QU
I hope she's going to meet a good boy in the future I hope you don't tell anyone all the nows Take Care Jennifer	anyone	anyone	1	DN
We have a great university and best teacher, if you really want to learn something, you need find a mentor and go ahead.	something	something	0.6598	MIXED
The employee morale will be awful and we can't lose anyone now because there is much work to do.	anyone	anyone	1	DN
When someone invited you to a home or a party, bring a small gift for example: flowers, wine chocolate,. . . .	someone	someone	1	MIXED
We need to remember our staff is too important and if we continue to do our job well anyone will be off.	anyone	someone	0.7935	CD
But if they do not live together something is wrong in the relationship.	something	something	1	DN
Dear team, I am writing for sumarize the last meeting about the sales of the company: *Laura asked if someone will be fired.	someone	anyone	0.8124	CD
Is it sexual harassment if someone I used to date won't leave me alone at work?	someone	someone	1	CD
The third reason is that traveling with people is more fun than traeveling a lone because if you travel in a group you will find someone who speakes your language so you will not fell alone.	someone	someone	1	CD
The boss was good person and everyone could talk with him about vacantion or something like this.	something	anything	1	MIXED
although i drive safety, it occur accident if someone drive risky.	someone	someone	1	CD
Moreover, it might be a good thing that scandales usually increase their fame, even if they did anything wrong.	anything	something	0.7957	CD
Famous people wins money with gossip and I never win anything if I gossip.	anything	anything	1	DN
And I think that if there is someone cheating someone I guess that is Alana, becouse she was a night club dancer and Gavin has been a nice men with a good character.	someone	someone	0.5974	CD
This music is very interesting, I like and recommend, if you want hear something	something	something	0.601	CD
I really think this is a frame, someone want blame him, and I agree with you, I bet in Alana.	someone	someone	1	MIXED
Dear Polaris, I know you are addicted to shopping, you should stop shopping, your mother told me you are always buying something, you should replace shopping with exercise.	something	something	1	MIXED
Please let me know if I miss anything Thanks sz	anything	anything	0.799	CD
When someone make a "strike" (all 10 pins knocked down) is scored, and take 2 more shots. %% Win the game who have more point.	someone	someone	0.7913	MIXED
No one from my close friends even don't think about something like that. But I'm looking forward to it.	something	anything	0.6	DN
I want to use my experience and knowledge to create something new that can help people that's what matters to me.	something	something	1	MIXED
On the other hand if someone have negative mind, thier face look not gloomy and unhappy but also ugly.	someone	someone	0.8043	CD
But people won't accomplish anything unless they put their shoulder to the wheel.	anything	anything	0.7975	DN
It's a small office, so there's not a lot of people, something about 14 workers.	something	other	0.6001	MIXED
This is the biggest problem, usually you don't do anything without a material scope.	anything	anything	1	DN
If anyone does not follow above dress code, will lost job!	anyone	anyone	0.6096	CD
If someone have any doubt please call me for more information.	someone	anyone	0.7968	CD
*Juan said that he didn't hear anything of our new product, and he don't know about it, but his opinion is that the product looks good, and people like it.	anything	anything	1	DN
I'm afraid and think about if something could be bad.	something	something	0.7964	CD
Do you know anyone who is a victim of discrimination?	anyone	anyone	0.6138	QU
Cars today have become passion for the people, a status symbol and if someone doesn't own, he or she dreams about owning a car.	someone	someone	1	CD
The round that normally worth 1 point becomes worth 3, 6, 9 or 12 when someone says Truco.	someone	someone	1	MIXED
I like clothes It's a very beautiful i like shoes also, i never did buy clothes or shoes or anything else from the online.	anything	anything	1	DN
How can I tell something if I have only suppositions?	something	anything	0.5965	QU
Have you ever met with anyone who had been discriminated against?	anyone	someone	0.5906	QU
I think that if you believe in something you will find time to do it.	something	something	0.7958	CD
If people could get over it and learn something , they would be successful with it .The Statement given is rather black and white .	something	something	1	MIXED
I want to show to them that they can do anything they wish to do.	anything	anything	1	MIXED
As far as I know, I didn't have news about if someone was killed.	someone	anyone	0.5957	CD
Food on the ship was not delicious, and there wasn't anything hot to drink, either.	anything	anything	1	DN
Friends can help cope with troubles or cheer you up to raise your mood and they don't require anything in return.	anything	anything	1	DN
For example if someone who get teased and calld paprica when he wore a green color shirt, he could feel insult.	someone	someone	0.8047	CD
I listen musical instrument, but I can't play anyone.	anyone	other	1	DN
Successful people on the other hand are not that likely to be put down if something does not work out as they planned it to be.	something	something	1	CD
Remember, if someone invited you to a house, bring a small gift for the host and don't stay to late. % % See you soon!	someone	someone	1	CD
On Wednsday I didn't made anything because I was sick.	anything	anything	1	DN
Furthermore - In my opinion you can't get really accurate information about character of someone you don't know by articles in media.	someone	someone	0.7989	DN
Definetly only new things give greater magnitude of success, since people are more inclined to newer and innovative things rather than the things which are already existing, there would certainly go for something new in the market.	something	something	0.7957	CP
government servant, police officer, hotel assistant or someone else?	someone	someone	0.587	QU
Have you ever experienced something unfair by your marital status?	something	anything	0.7982	QU
We are involved in the Manufacturing and search for someone in the environment of Manchester.	someone	someone	1	MIXED
Wow I have something else to tell you her parents want that she get marry but with who?	something	something	1	QU
Other than that dating with someone is more important than the hunger of the community for most of the young people of the current time.	someone	someone	1	MIXED
The police think that was the children because don't has stolen anything no money.	anything	something	0.4043	DN
If someone who want to try new things even there are some risks, they should try.	someone	someone	0.6064	CD
They rarely consider industry condicions, product range and most stars don't know anything about the product.	anything	anything	1	DN
Have you even complained something about discrimination in your friend?	something	anything	0.6071	QU
I'm all for tests, but if it can teach something to the students.	something	something	1	CD
After that, they can get good understanding and plenty of emotions, and they will never hurt around people. I agree the statement because I know the successful people in the history always tried something new.	something	something	1	MIXED
If Gavin Taylor is cheating someone is not my problem.	someone	someone	0.6064	CD
If someone who born with artistic talent don't have to enough practice, he or she won't have to get a big achievement.	someone	someone	0.8008	CD
so if children achieve something and their parent give reward for children then children more effort to achieve something.	something	something	0.8101	CD
Do you know someone who does the same work that you do and receive more or less money?	someone	anyone	0.6087	QU
If someone hits a strike, then the player gets two more shots. % % Add up all the points at the end.	someone	someone	1	CD
The e-ticket is a ticket, usually for someone to travel an aircraft, that is held on a computer.	someone	someone	1	MIXED
The fact that older people do not have the energy or health required to party all the time, eat anything they want, run cars, or whatever young people do nowadays, does not mean their life is over and they do not enjoy life anymore.	anything	anything	1	MIXED
I am really surprised about the free journey to California, because I've never ever won anything before.	anything	anything	1	DN
First, a possible explanation for this statement could be that in twenty years there is a shortage of oil or the prices are that high that barely anyone could afford the gas.	anyone	anyone	1	DN
First of all, people can relate to someone like this much better than an elite sports star.	someone	someone	1	MIXED
If he haves someone unreliable in his side, he can get in trouble, because spreading gossips is the easiest way to burnt the famous people.	someone	someone	1	CD
someone is trying to frame him for money maybe. They got married only a year ago, his wife didn't likely move out and lived on her own. I saw their pictures on that trip they took to Paris, they sure looked very happy!	someone	someone	1	MIXED
So even though people get the knowledge some subject a little, they can understand others very well because they have somethings in common.	something	something	1	MIXED
I was really in shocked, I promised myself I wouldn't say anything, but they are together only three months.	anything	anything	1	DN
Mr. zhou is a people who takes everything vey carefully, if something need to be done, it must be done very well.	something	something	0.6158	CD
In contrast, now our family owns two cars and also it is more difficult to find someone who doesn't have a car in these days.	someone	someone	0.6129	MIXED
But there is something important that I" ve being worrying about: what to tell them about having a Family?	something	something	1	QU
I like BBQ because it's to exciting and patience. What something do you like to do?	something	something	0.6229	QU
I really shouldn't say anything, but you're my best friend and I can't keep this secret anymore!	anything	anything	1	DN
And how can something that everybody can do getting you to be a succesfull people?	something	something	0.8235	QU
Other item of our agenda, we've argued the possibility of a salary increase, I'll try to get it but I can't promise anything because it isn't in the budget.	anything	anything	1	DN
I have some shocking news, but please, don't tell anyone about it ok?	anyone	anyone	1	QU
We always hear those scary stories that people were murdered or kidnapped that when I'm walking on the street there I don't carry anything with me. %% Even though, my mobile. I'm so scared to be assaulted.	anything	anything	1	DN
If something not happen with each other, why don't they live the same house?	something	something	0.8031	CD
When someone engage a verbal conduct with the purpose of violating women dignity, how can they protect themselves.	someone	someone	1	MIXED
In a conclusion I will buy his album, but if I don't discover something interesting inside, I won't buy another one.	something	anything	0.793	DN
after i get out of the bus, to go to my job, but before it, i took her telephone, and i said for her, that i will call for her to ask out, eating something out, and in the next week, i did it, and a part from day, we started to date, and we are dating, maybe in the future we'll marry.	something	something	1	MIXED
My work has very risky because it requires very concentraition so I haven't to oblivious anything.	anything	anything	0.6376	DN
If you don't do something out of the ordinary, then your advertising campaign will blend in with the other millions of advertising campaigns out there and will not even be remembered by your target audience.	something	something	0.6	DN
And is there anything eles I have to get with me?	anything	anything	0.8	QU
I think that if someone is serious about the sport he doing he shouldn't drink or party every other night.	someone	someone	1	CD
For example lights in many rooms are not working and I can't see anything.	anything	anything	1	DN
I'm very flattered by your interest, but actually. . . I'm already involved with someone and I love him very much.	someone	someone	1	MIXED
An other option is eat something on Liverpool, the department store, visit the gourmet area, you can find some good, delicious and healthy food, my favorite there is blueberry salad.	something	something	1	MIXED
Don't ask anyone this question: how much is your salary?	anyone	anyone	1	DN
and if someone never takes just one time a risk in his/her life, probably he/she has gone next to marvellous things.	someone	anyone	0.4029	CD
Secondly, young people nowadays are so tide up with their normal duties that they do not have to spare any time for anything else.	anything	anything	1	MIXED
If someone of the team needs advice he's there to show him or her how things work and to tell them some of his creative ideas.	someone	anyone	1	CD
I was affraid that someone was near my house and wanted to get to my house.	someone	someone	1	MIXED
I don't know anything about vacation because I was trainee for about 3 weeks.	anything	anything	1	DN
If you want to see something more entertaining you must pay a Cable Tv, where you can see sitcoms, movies and many programs to children.	something	something	1	CD
someone murder one woman last night in the fifth avenue near the bookstore about 8:00 pm.	someone	someone	0.8039	MIXED
Has he done anything to his colleagues so that they refuse to help him?	anything	something	0.7912	QU
I prepare food like meet and vegetables for the BBQ, anyone who have specil taste can tell me.	anyone	anyone	0.803	MIXED
Don't: When you don't know someone very well don't talk about private thinks like money, religion, politics or relationships.	someone	someone	0.6034	DN
The John Tiles Ltd is looking for someone who is experienced, reliable, organized and good at communication to became a Regional Marketing Manager of this company.	someone	someone	1	MIXED
Tom said that he hasn't hard from anything about it.	anything	anything	0.4057	DN
If someone specialize in one specific things, he cannot talk with other things freely.	someone	someone	1	CD
The reasons are that when you are young (I always suppose) you have much energy to dicover something new, for example new sports, new interests, new passions or new works to do.	something	something	1	MIXED
Young people work for the things they want and when they achieve they find themselves much more happy than anyone else.	anyone	anyone	0.8145	CP
Villa and Business - Last but not least, if you want something new, luxurious and spacious this is perfect for you.	something	something	1	CD
I'm very angry because you didn't anything and I swiped the floor, mopped the floor, washed the dishes, made the beds and did the shopping on Saturday.	anything	other	0.6005	DN
Do you discriminate someone for his/her gender, race, preferences, etc. ?	someone	someone	0.7957	QU
Was it connected with your gender, appearance, age or something else?	something	something	0.8111	QU
Second, if you do something that you have no idea what it is about, there is a low chance of being successful.	something	something	1	CD
It would be nice if everyone would bring something to eat.	something	something	1	CD
Especially students ususal don't have ability to create idea or concepts, therfore just leaning facts dosen't make anything for the students.	anything	other	0.4	DN
I continued asking if he had some question until that point, but he didn't anything to ask.	anything	anything	0.6071	DN
Hence, I suggest if someone was died because of the car accident and the driver, driving after drinking alcohol, will be punished by life imprisonment.	someone	someone	0.7953	CD
Have you or anyone you know in your workplace been a victim of unlawful harassment?	anyone	someone	0.8186	QU
I had a maximun price to sell them, for example five euros for one T-shirt, and if someone buy five or more clothes i reduced the price for 3 euros each.	someone	anyone	0.6052	CD
I didn't damaged anything in that house and I'm entitled to get my deposit back.	anything	anything	1	DN
like when a students understand an idea or a concept it shouldn't be right or true or it might not be a good idea or a concept that will not be useful for him or her, on the other hand when they learn facts they can form their ideas about anything.	anything	anything	0.6254	MIXED
suddenly my computer was stopped and can't do anything also can't boot and can't logoff.	anything	anything	1	DN
Please let me know if there is anything I missed.	anything	anything	1	CD
For those reason, successful people try new things and take risks rather than only doing what they already know how to do well. Gathering new knowledge and understanding processes of something is of high value at every time in a persons life; especially during study.	something	something	1	MIXED
Happiness is not a question of age but of perspective and I am sure that anyone, young or old can enjoy life if they are ready for it. I agree with this statement.	anyone	anyone	0.8111	MIXED
First of all, I can say that the person who knows lots of information abouts lots of the topics trusts him or herself more than anyone who emphasizes the importance of the specification.	anyone	someone	1	CP
Taking everything into account I believe that successful people tend to risk for their `` nature '' , but it can not be forgotten the the risk is something of acquiscent and unforeseable .	something	something	0.5801	DN
for example, someone could open a new business by following the other people's thoughts and plans, but the successful person always tries to find a creative idea instead of doing what the mainstream of people does.	someone	someone	0.5914	MIXED
Dear Mac I know I shouldn't tell anyone about this.	anyone	anyone	1	DN
The members of the group patroll around downtown and if they find someone who needs help, they help or advise him/her.	someone	someone	0.7935	CD
Once they operate the computer and connect the internet, they can be, they can work, they can shop, they can chat with friends, they can take classes, they can do anything they do in the real life outside.	anything	anything	0.7979	MIXED
If someone does not understand the idea behind a concept, it does not help to know all the facts.	someone	someone	0.5976	CD
Therefore, with thoroughly considerating, I can draw that I would incline to travel by my own. actually if we dont have idea and concept about anything then we cannot understand that.	anything	something	0.8	MIXED
If someone is prepared from the begining to face a world and a professional life which could always evolve, he would have to be effective and moreover have a descent life.	someone	someone	1	CD
In winter , the weather is very cold , if you have it , you don't worry about how the weather it is. Take it on your bed, put the laptop on it , you will share warm and do anything online, in the meantime , you can chat with your friends and keep indoors.	anything	something	1	MIXED
Shopping Addiction - Help & " I was wondering if anyone can help me fight my shopping addiction.	anyone	anyone	0.8075	CD
The one that I could find will be a bad-paid job and I don't know if I get something better after.	something	anything	0.6126	CD
If someone would just learn the formulars but doesn't know how to use them or how to combine them he won't do good on any test.	someone	anyone	0.6061	CD
First, i think that if someone wants to set up a company he has got to start a training or look for an experienced partner or counsellor to understand how the business goes.	someone	someone	0.8008	CD
At your work, have you ever meet someone who had been maternity leave and when she come back is demoted?	someone	someone	0.6044	QU
If someone broke the laws, he has to pay a expensive law and maybe to be arrest.	someone	someone	1	CD
I promised myself to don't tell anyone about this, but I guess I just can't keep a secret.	anyone	anyone	1	DN
What do you think about harassment, when someone is subjected to unwanted conduct relating to their gender?	someone	someone	1	MIXED
I never saw something like that, but i used to travel a lot.	something	anything	1	DN
Now before begin develope this speech let me ask you something. . . . You know my goals for this presentation, let me know if anyone have questions about the different topics for today, for me that is very important.	anyone	anyone	0.8061	MIXED
To me a successful person is someone who is in control of his life and able to live it the way he wants it to be.	someone	someone	0.7979	MIXED
Do you know anyone who neglected reporting discrimination in fear of being victimzed?	anyone	anyone	0.6176	QU
Hello: Our marketing team strongly believes that in order to broadcast a believable commercial we do need to use someone that is more in contact with people.	someone	someone	1	MIXED
It's common have assault, so don't go with anything expensive.	anything	anything	1	DN
For example, When you see a television advertisement that shows someone eating an icecream on a beatiful beach with clear water, nice sand and blue sky.	someone	someone	1	MIXED
Second, because they are curious people are very aware of the news and something in the entertainment.	something	anything	1	MIXED
Traveling in group will not allow someone whose intention is to research to fulfill his needs.	someone	someone	0.6111	DN
When I go to small shops sometimes it is not pleasant, the sales assistants always want me to buy something.	something	something	1	MIXED
A succesfull man stands more chances for better and varied experience and i believe can handle critical decisions and policies better than someone who is a fresher or less experienced.	someone	someone	0.8132	CP
But young people have much less physical problems so that we can try anything we want to.	anything	anything	1	MIXED
Going to school allow you to ask questions to professors if you don't know something or don't understand something.	something	something	1	DN
Action item: Fridonn said, Don't tell anyone about this out the company.	anyone	anyone	1	DN
I hope we'll remain friends at least, and sometimes, if you want, we could meet up for dinner in that new restaurant in New Town or we could do something like that.	something	something	1	MIXED
Please say " Please" if you want someone help me.	someone	someone	0.5882	CD
it's our teacher birthday next week i don't have enough money but i can spend $15 and maybe we can bring something to the class room.	something	something	1	MIXED
For example, if we need to applogize to someone for serious something, we have to bow deeply for around one minites.	something	other	0.7939	MIXED
Sam loved Lucy more than anyone else and Lucy too.	anyone	anyone	1	CP
It's your time to Rock, We are looking for someone to be the next Regional Marketing manager on Manugacturing Industry.	someone	someone	1	MIXED
I'd like to keep studying to be a Master in something related to IT, but I don't know what yet.	something	something	0.8016	MIXED
If you need something else, please, fell free to contact me.	something	anything	0.7979	CD
Of course, if you did something wrong then make sure apologise for it.	something	something	0.7966	CD
But if you are interested in something to ear and think press the play button right now!	something	something	1	CD
I don't like clothes stores in my neighborhood because they don't have anything good to sell.	anything	anything	1	DN
Do you know someone who was discriminated in the workplace?	someone	anyone	0.6	QU
I want to tell you so news, but I don't want you to tell anyone.	anyone	anyone	1	MIXED
If you want to know anything more about this job, please find my attachment the zookeeper's job ad. .	anything	anything	0.795	CD
how can we say if something is good or bad, true or false if we have no ideas on what is bad like or true is like?	something	something	0.8065	CD
Do you know someone who were victim of any kind of sex discrimination?	someone	anyone	0.5885	QU
In addition to that, learning through experience is a lot better and more satisfying than someone telling you about it.	someone	someone	0.7979	CP
Almost every part of the Brazilian Carnival, if we want something which fatasiamos with and headed out on the street.	something	anything	0.5949	CD
I really like my job and I can't imagine myself doing something differente than that.	something	anything	0.6161	MIXED
On the contrary, if hotel has room service, you will eat breakfast, will drink alchol, get something you need, do another thing in your room.	something	anything	0.5907	CD
So, if someone has confidence it is easy ro improve their appearance.	someone	someone	0.8016	CD
If you are invited to someone's house, I think this advises can help you: 1) never arrive early.	someone	someone	1	CD
If someone hits a strike, next player gets 2 more shots.	someone	someone	0.7941	CD
For example, if someone is murdered, all Italian channels must to speak of this murder and show to people and children by videos its details. But I think that TV should be educational: children are watching!	someone	someone	0.5989	CD
Dear Dani, I know that because of distance, we haven't talked to each other like we used to, but I need to tell you something.	something	something	1	MIXED
He was asking me something about the school, because he was knowing me from the school.	something	something	1	MIXED
And besides, that is unbelievable that someone can cheat just after one year of marriage.	someone	anyone	0.7924	MIXED
I recommend this song, specially if you are someone who comes from country!	someone	someone	1	CD
They say that if you have this mp3, you have more opportunities to be considered by your friends, or by other people, that you have something more that give you what other haven't, give you celebrity or more opportunity with the girls or the boys.	something	something	0.8024	MIXED
And i think its make lot of differenc that if we do something from our bottam of hart, and we do something because we have to do it and we dont have any other opation.	something	something	0.8116	CD
because if someone hear my small talk, that person can get feel hurt.	someone	someone	0.5957	CD
The presenter didn't know anything about the topic he was supposed to expo.	anything	anything	1	DN
I was playing with some friends and we are running around the buildings of my street, when I slipped on the something on the floor.	something	something	0.5995	MIXED
Do you know someone that has already suffered from sex discrimination?	someone	anyone	0.5873	QU
On behalf of Bill Frisco, founder and owner of Frisco shipping I want to begin by wishing a warm welcome to anyone of you.	anyone	other	0.3976	MIXED
I'm so scared of what will happen, i let you now because if something happen to me you know what you will do.	something	anything	0.6	CD
To show this hidden characterisitcs almost every product is tested by independent magazines or something alike.	something	something	1	DN
I was afraid that if I started running someone would take after me.	someone	someone	1	CD
Either because they think "I'm not going to do it, someone else can do it. " or they think "If nobody is cleaning it, why should I?"	someone	someone	0.7957	QU
In a lab, we can never be alone, because if something going wrong, you may die and there is no one to help you.	something	something	0.6024	CD
You shouldn't yelled at the street to someone, it's inappropriate.	someone	anyone	0.6176	DN
Like I said in the second paragraph, when you are young and don't have your kids yet, you can almost do anything.	anything	anything	1	MIXED
The idea that he had for being successful could have been used by someone else and this would have not given him that fame nor the credit, because he was the first person to invent and start the new technology he was so well known.	someone	someone	0.8043	MIXED
For example , fly to spice is one of the dengerous things that you may lose your life , but we descover something new that we never know it .	something	something	1	MIXED
If someone does the same job or same step in less time or with increased productivity than there is success in it.	someone	someone	1	CD
Like learning the language if someone have that language background already, it will help that person learn more effective.	someone	someone	1	CD
So, the future is unsafe and only there're 2 days where you can't do anything, the tomorrow and the yesterday.	anything	anything	0.5946	DN
I fell down the new bicycle, but I don't broke (or I did not break) anything in my budy.	anything	anything	1	DN
the journal sad that we had a fight before a murder e until now nobody saw anything for help the investigation.	anything	anything	0.7985	DN
I didn't anything in this house and I'd like to get my deposit back but they're refused.	anything	other	0.5995	DN
The weather is very wet today, i can't do anything outside, so i'm going to the mall.	anything	anything	1	DN
Once I hurt my knee and then I made a cirurgy and pass 3 months without no exercise, when I came back was really difficult beacuse i didin't trust in my knee and always thinking that something wrong was happening.	something	something	1	MIXED
Secondly make a list of whatever you have and find out, if you really need anything more.	anything	anything	0.799	CD
please tell me which part i need to add if it is lack of something else. )	something	anything	0.793	CD
If anyone wants to study every subject, he will end with learning nothing.	anyone	someone	1	CD
Hence Advertising became about doing and Saying anything and everything to sell that item, regardless if that item is worth selling in the first place.	anything	something	0.5996	MIXED
They are not worried about failing because they know they are good in something .	something	anything	0.4071	MIXED
I never hear something like that in nuevo Vallarta it is so bad.	something	anything	1	DN
Don't shop by yourself but be with someone who don't compulsively spend Remember, you are a worthwhile person, no matter how much or how little you own.	someone	someone	1	DN
When I have arrived Varna bus terminal, I asked someone my bets to find my hotel.	someone	someone	0.8065	MIXED
After all, an institution would prefer an expert to be a part of their team rather than someone who knew a little bit. I agree with the statement.	someone	someone	0.7957	CP
First of all, understand ideas is very important for students because if we don't know proceed, we cannot do anything.	anything	anything	1	MIXED
When I was walking, someone behind my down offered to help me because she saw my accident on the way down.	someone	someone	1	MIXED
I believe that most of electricity will produced by air and sun and something new developed technology in several years.	something	something	0.6049	MIXED
At the same time, I would like to help people who need something or help (do volunteer).	something	something	1	MIXED
Regarding your question has anything like that ever happened to me?	anything	anything	0.7979	QU
Thanks, if you need something else. . . call me please Kisses good luck. %%	something	anything	1	CD
Because its the first part that the student start to learn something about that subject and pay the most attention to the teacher with the happ ?	something	something	0.8227	MIXED
Findings: - Of the 30 customers interviewed, 90% accused the high prices the main reason of why they don't purchase anything to Indutecsa.	anything	anything	0.6045	DN
It is vital that you lead your team gets along together well, not them allow to wisper behind anyone else.	anyone	anyone	0.5978	MIXED
Finally, tell to your friends to help you telling that you don't need buy something when you shopping together.	something	anything	0.8083	DN
I shouldn't tell anyone because could be not true, but I can't keep a secret.	anyone	anyone	1	DN
At the beginning of the metting the Enginneering Manager read the agenda and asked us if it wuold have something else to include in that.	something	anything	1	CD
Indeed someone who works twenty hours a week is more likely to help his community than someone who work eighty hours a week	someone	someone	1	CP
I want to work in some laboratory in the something developed country of Europe, next five or seven years. %% Although I can speak English, read English, understand English, I write English very difficult.	something	other	0.7966	MIXED
If you came here that I would remind you something as following.	something	other	0.399	CD
I think the true cause of the improvements in my life is the internet, i can download everything i want without wasting my money, and i can talk with anyone around the world.	anyone	anyone	1	MIXED
I encourage you to apply as soon as possible on this job offer, otherweise someone else will grab this before.	someone	someone	1	MIXED
I treat you like my friend and I wonder our friendship will last forever. Actually, I should tell you ealier, I have been involved with someone else who lives downtown.	someone	someone	1	MIXED
If yes, the person who was being descriminated reported to someone?	someone	someone	0.8221	QU
Thirdly, if someone wants to improve their immune system, garlic crushed with lemon and acerola is a great recipe.	someone	someone	0.6064	CD
Have you ever been a victim of discrimination or do you know someone who does?	someone	anyone	0.8005	QU
When you walk with someone, you should catch up with him or her.	someone	someone	1	MIXED
I read a lot, I love music, theater, cinema, because the pleasure of a travel can't be replaced by anything else.	anything	anything	1	DN
I think also that is important take risk to achieve success without damaging anyone: so it's important that everyone tryes and takes risks using coscience. I believe that it is more important to understand ideas and concepts rather than learning facts.	anyone	anyone	1	MIXED
Often we looked repetitions and if something didn't like us we tried to correct it.	something	something	0.5995	CD
If someone says old people live their life just boring and nothing special, that is not true, they can live their life what they like to do and spend the time who they wants.	someone	someone	0.5978	CD
If there is anything to explain, don't hesitate to let me know.	anything	anything	0.7944	CD
But also they are cute, if they to have something such as banana.	something	something	1	CD
Even if someone isn't polite you should always treat the other with respect.	someone	someone	1	CD
I'm 20 years old on the moment, So I don't do anything how it was before 2000.	anything	anything	0.8038	DN
And he hardly get upset with anyone else in the office.	anyone	anyone	0.8041	DN
Hi, I am really flattered but I am sorry to say you that I am involved with someone else.	someone	someone	1	MIXED
If a human behaviour focus on a lot of issues, he or she can be aware of much more things but cannot know anything in details.	anything	anything	0.7957	MIXED
Dear Mariah, It's very important that you don't tell anyone about this.	anyone	anyone	1	DN
So tell me has anything like that ever happend to you? Let me know. Write soon.	anything	anything	0.795	QU
If something big happens during this year, we might change a little, but so far we hope to make it.	something	something	0.8382	CD
I understand they all work hard for raised us up but at last my mother doesn't have anything for her careers.	anything	anything	0.6057	DN
5) Did you answer for this discrimination or do something to punish the person?	something	anything	1	QU
There is no problem if you ask someone this kind of questions: Where do you work?	someone	anyone	0.7988	CD
Also, if someone gets injure on the way of the trip, we need to go to hospital or need to spend time for them.	someone	anyone	0.6032	CD
Finally, the CEO and his team decided to not fire anyone and give one more chance.	anyone	anyone	0.7926	DN
I love the innovation in science, so that we can find a way to resolve so many diseases, but we also could destroy a whole nation if something get wrong.	something	anything	0.7797	CD
Definitely, this rhythm is not the best for me, i would rather than something eletronic to listen.	something	other	0.4086	CP
Action item: Sarh said this is confidential, do not talk to anyone outside the company.	anyone	anyone	1	MIXED
Do you know someone who had some discrimination case?	someone	anyone	0.5957	QU
In italy if someone introduce you a person, you have to smile and you're suppose to give a handshake with your right hand.	someone	someone	0.7957	CD
After thanking every member for being here, the CEO began the meeting by talking about financial trouble the company met for few past months He asked for propositions from everyone, telling anyone could have a good idea, that could finally save our results.	anyone	anyone	0.5978	MIXED
Cause It's too expensive and there aren't any something I have.	something	other	0.4041	DN
I think I need to do something more exciting and challenging for the rest of my life.	something	something	1	MIXED
When you are having a group conversation if you don't know anything about the topic at hand you will be seen as a person without any kind of knowledge.	anything	anything	1	DN
People don't understand what kind of problems money brings to them, and when i say people i really mean the people who have alot of money and no problems and don't care about anything around them.	anything	anything	1	DN
We can be sure that if something happens at work we will be safe, will it be earthquake or a slippery floor.	something	anything	0.8085	CD
In emergency situations, if perhaps someone fall down the stairs, the system will call the ambulance.	someone	someone	1	CD
For instance if you decide to travel to South Africa you would not only understand even a word but also would not learn anything about these new country completely different from yours.	anything	anything	1	DN
Hey, Pinco I promised myself not to tell anyone about this but you are my best friend and I hope you can keep a secret.	anyone	anyone	0.7935	DN
If you had, could you please share your experience? Do you know someone that have been victimized when tried to exercise his or her rights?	someone	anyone	0.7957	QU
What would you do if you saw someone nearby being discriminated against?	someone	someone	1	CD
You are allowed to play alone or if you like someone can help you, like: friends or family.	someone	someone	1	CD
Do you know someone who have ever been victimized some discrimination, but did not report his/her situation for some kind of fear, be for lose the job, friends, for not belived or another situations?	someone	anyone	0.7944	QU
If you anyone is planning to visit Saudi Arabia, he should take into his or her consideration the following etiquette behaviors.	anyone	anyone	0.7959	CD
After everybody got a ice cream, less a friend that didn't got anything.	anything	anything	1	DN
I know that he has a huge potential and many skills but to become a good leader, someone who your team can rely on, he needs to listen to constructive reviews and accept them, not only compliments. %%.	someone	someone	1	MIXED
If you visit someone for a special case, for example a birth; you should buy a gift for the baby.	someone	someone	0.8085	CD
Secondly, If someone commited only on only one specific subject, he or she might be biased losing his or her academic balancing.	someone	someone	1	CD
Let's go: e-ticket its used for someone to travel on an airplane and is done on the computer and not on paper.	someone	someone	0.8	MIXED
I've been there for 6 months and I haven't broken or damaged anything during that time.	anything	anything	1	DN
Life has never been easy for anyone and never will be.	anyone	anyone	1	DN
Forth, if you do something wrong, you should tell the hosts, make appologise sincerely and do some help.	something	something	1	CD
Moreover, they will do anything they can to attrack consumers and influence them to buy more of their products.	anything	anything	1	MIXED
The drinks' taste was good, on average, I couldn't see anything that differs from other restaurants.	anything	anything	1	MIXED
Hi friend, I shouldn't say anything but it is important for everybody to know wahat I have discovered, and of course I trust you.	anything	anything	0.7966	DN
You know something about the Sex Discrimination Act of 1975 (SDA)?	something	anything	1	QU
We are looking someone with strong writing communication skills, who is smart, energetic and able to take responsabilities.	someone	someone	0.8186	MIXED
I think that unless we do something different of we have done until now, we will have a big problem with our planet.	something	something	1	MIXED
Do you know someone who returned to work after maternity leave and was demoted?	someone	someone	0.5942	QU
Dear, I'm sorry about the weather, but you need to do something, you are on vacation!	something	something	1	MIXED
My pets will stay at home and I want to ask you to do something for them.	something	something	0.7966	MIXED
Welcome, if you need something have a market opposite my house and next have a small, the gas station is on Long Street, the subway station is on central park on Gondon Street.	something	anything	0.8086	CD
if you ask me about something i always want to do it will be skydiving when i was little kid i always love speed, i love but my life in the limit.	something	something	0.5959	CD
Some women were battered and nobody did something about that.	something	anything	1	DN
If someone wants to cook very well, then they need to make distasteful foods first.	someone	someone	1	CD
In large part this is due to his speed and ability to run the length of the pitch without passing the ball to anyone so he can score another goal!	anyone	anyone	1	MIXED
I also live with my parents, I don't have anything to worry about it.	anything	anything	1	DN
Well, I'm almost 17 years old and I don't know exactly what I want for me, but something I know: I want to go to the college.	something	something	1	MIXED
5 - If you visit someone, remember to take a souvenir.	someone	someone	0.8006	CD
So, this search for a means of transport might end anyone with usage of car.	anyone	someone	0.5979	MIXED
Don't forget to make food for the dog, and you should walk the dog every day in the morning, if there is anything call me anytime, thanks.	anything	anything	1	CD
There're so many possibilities to sell damaged or just bad products and nobody can do something against it.	something	anything	1	DN
You can take your dobts with him, but if you need anything, please call me.	anything	anything	0.8302	CD
I have enough money for my current expenses and I am not depend of anyone for anything.	anyone	anyone	0.8	MIXED
These stories resulted in a police investigation or a lawsuit (or something similar, involving public authorities)?	something	something	1	QU
What are the penalties for anyone who commits acts of discrimination?	anyone	someone	1	QU
Let's be honest: we have never heard something like this about Paula.	something	anything	1	DN
I think if i get something easily, i also can lose that easily.	something	something	1	CD
If someone have any doubts feel free to ask me.	someone	anyone	1	CD
Bring a gift if you visit someone and control the kids, no noisy.	someone	someone	1	CD
Do you know someone who has suffered any kind of discrimination?	someone	anyone	0.6029	QU
Anyway, when I enter at the high school I didnt know anyone and she was in my class.	anyone	anyone	1	MIXED
2- Do not be late if your visited someone there.	someone	someone	0.7979	CD
They can released from jail if someone from their team run to them and tag them.	someone	someone	0.6043	CD
I just ate at the restaurant. The meal was terrible. The salad was bland and the steak was too oily. I coudn't eat anything!	anything	anything	1	DN
Although he had a clear and strong voice he didn't say anything interesting.	anything	anything	0.7943	DN
Every time when I see someone in the sky in a hang gliding, I think it should be a fantastic experience so I imagine the wind touching my face and all of my body, It should be totally amazing!	someone	someone	1	MIXED
If something interests me, I click on the orange text in capital letters to see step by step description of the recipe that is accompanied by pictures.	something	something	0.8016	CD
Do you know someone who were victim of any kind of sex discrimination?	someone	anyone	1	QU
My father is very generous and helps me out if I need something special - for the normal things I can support myself.	something	anything	0.5934	CD
In weekends we don't have anything to watch in local channels, is always the same boring programs.	anything	anything	1	DN
Now, he refuses to give me my deposit back, because he need to use my money to make repairs but I haven't broken or damaged anything during that time. % % Yours sincerely, Julia	anything	anything	0.7975	DN
Don't shop by yourself but be with someone who don't compulsively spend Remember, you are a worthwhile person, no matter how much or how little you own.	someone	someone	1	DN
In the Korea culture just joke, adult said that if you meet someone in the bar, you never didn't say about religion, political view, and women.	someone	someone	1	CD
I promised myself not tell anyone about this, but I guess I just can't keep a secret.	anyone	anyone	1	DN
Hi, I'm really flattered by your feelings, but actually, I'm already involved with someone and I've even got engaged.	someone	someone	1	MIXED
Feel free to write me if you want to discuss something interesting related with software development or share professional experiences.	something	anything	0.5889	CD
If there is anything you dont like in our dinner just send me an email.	anything	anything	0.7969	CD
This is often the reason why professors specialize in something: they choose a specific field, concentrate on particular aspects, start to study, work and reserach and they develop a deep competence in their specialized topic.	something	something	1	MIXED
Do you know anyone that Have experienced some kind of sexual discrimination?	anyone	anyone	1	QU
But if I have to say something, I didn't want to believe it either but if they're living separately, something has got to be wrong.	something	something	0.7975	CD
The online catalog has shoes, shirt and boots, or belt, pants. Do you want to something else? Tell me now.	something	anything	1	QU
I have wirtten to the landlord about these problems and he promised to fix them, but he hasn't do anything in fact. %% Now I have moved out, but the landlord keeps my deposit because of those problems mentioned above.	anything	anything	1	DN
Every time you see someone near to crosswalk you need to stop the vehicle and wait the pedestrian walk through the street.	someone	someone	0.7969	MIXED
I wouldn't tell anyone about these, but you are my best friend.	anyone	anyone	1	DN
I couldn't do anything because of no electricity, so I went to the beach!	anything	anything	1	DN
And moreover I've heard she is pregnant. . . Have you heard anything about it?	anything	anything	1	QU
Here are some examples about what you are or not supposed to do: You can talk while walking on the course, but youre not supposed to talk while someone is ready for swing his club.	someone	someone	1	MIXED
Hi my darling, I'm flattered but I've involved with someone already who I have known him long ago.	someone	someone	1	MIXED
He also has a good sense of humor and loves to help someone with kindness.	someone	anyone	0.8065	MIXED
Do you know someone that has been in the same position than you?	someone	anyone	1	QU
If someone hits a strike, then the player gets two more shots.	someone	someone	0.5937	CD
But in 1975, on the day of Kabuls annual kite-fighting tournament, something unspeakable happened between the two boys.	something	something	1	MIXED
Also because I gave it to him and if something went wrong, it would be my responsability.	something	something	0.8101	CD
If anyone offends the Dress Code, you will lose your job.	anyone	anyone	0.8096	CD
He didn't tell me about lights which were not working and about something else, when I signed a contract.	something	anything	1	DN
It" s long time, although at the same time I can finish my plans for the salon and think about if I should also study something else to make the salon better.	something	something	1	CD
But, if you think a little more, he is not saying anything against this rumor.	anything	anything	1	CD
Besides, if she wears something cloth, it encourages me to buy the same one, only by seeing the shot.	something	something	0.8013	CD
I think a waste of time, because not serves to something very useful only to flirt.	something	anything	0.5856	DN
For example, if you talk about something that others don't know, it can make others boring or uncomfortable and it will lead to no more conversations with you later on.	something	something	0.7975	CD
She asked her collogue if he knows someone else for this position.	someone	anyone	1	CD
I was really angry because my car was new and I didn't do anything wrong.	anything	anything	1	DN
I shouldn't say anything but I guess I can't keep a secret, but you are my best friend.	anything	anything	1	DN
If someone don't turn on the blinker, that causes an accident.	someone	someone	1	CD
Please, write me if I forgot to say something else.	something	anything	0.799	CD
The third is when someone treats the women less favorable because she rejected the unwanted conduct.	someone	someone	1	MIXED
Finally this behaviour is leading you to success only if you aim for something you are capable of. To my mind, most advertisements make products seem much better than they really are.	something	something	0.8065	CD
You are in a moment of your life where you can still chose to become anyone.	anyone	someone	0.8048	MIXED
I think that Tom can be less aggressive, if something does not work.	something	something	1	CD
If someone is subjected to sex discrimination, what exactly should he or she do?	someone	someone	1	CD
And if you like something want to buy it which is not necessary, such as a fashion dress, just wait couple of days to think about it more.	something	something	1	CD
I was sat down alone in the class and I didn't met anyone yet, and she decided sit down next to me.	anyone	anyone	1	DN
I thought that if I said something specific about her he would look at her in a different way.	something	something	0.7912	CD
Tha same reason apllies to a student that can learn how to do a c-section, or learn the tehcnics aspects of how to perfomr it, but if he does not have all the anatomical information about the human body, anything can go wrong in that procedure and it will turn to the death of the mother and the baby.	anything	anything	1	MIXED
Have you heard anything about an international association that could represents women rights against sexual discrimination?	anything	anything	0.8	QU
In a hot sunny ordinary day, how would bad guys come out boldnessly, and point a gun at someone's stomache, aren't they afraid being caught by the cops?	someone	someone	0.6064	QU
If they find guilty someone for discrimination, how is this person punished?	someone	someone	1	CD
With just memorizing or learning some facts from somewhere or someone are impossilbe that people let know about the facts, understading is obviously needed.	someone	someone	0.8033	MIXED
And I want to say that you should do in this country: If you go to visit someone, you should bring a small gift.	someone	someone	0.8255	CD
You never do anything so, Thursday as well as my chores I payed the bills for you.	anything	anything	1	DN
If someone is asked about his salary, he will be upset.	someone	anyone	0.5933	CD
You should: 1. Bring a small gift when you Visit someone 2. Control your children 3. polite let ladies go first You shouldn't: Yell, right time, alone at night, smoke in any building.	someone	someone	0.5924	MIXED
When I started to play soccer in High School, I start to feel fear of the possible things that could happen to me If someone accidentally hit me and I could have a broken leg or feet.	someone	someone	0.6109	CD
It mustn't yell at someone in the street, you must control your children when browsing Hope you have a nice vacation in Canada.	someone	someone	0.7935	DN
I must contact her and I wish you can help me out to do that, what I need you to do is email your highschools friend to know if someone has news about him.	someone	anyone	1	CD
Hi, i am finishing my buy in the catalog online, you want something?	something	anything	0.8	QU
By the way, has anyone heard something about the other gossip about the liaison between Alana and an unknown man?	something	anything	1	MIXED
We avoid making too much noise, staring at someone or using offensive worlds in the office.	someone	someone	1	MIXED
there are numerous reasons to support this point and I would only explore some of them and describe as follows: The first and foremost reson to support my point is just as someone said, young people are more energetic than older people.	someone	someone	1	MIXED
Probably, someone try to frame Gavin Taylor for money and try to make him look bad.	someone	someone	1	MIXED
* Robert asked what is the next Projekt an I asked him I haven't heard from anyone yet.	anyone	anyone	1	DN
Do you meet someone whose had been a victim of indirect discrimination. ?.	someone	anyone	0.7979	QU
How does someone from a small town go to work in a big city?	someone	anyone	0.5929	QU
If someone died i have to wear black clothes it is very important!	someone	someone	1	CD
The Regional Marketing Manager position requires someone who would be able to design adverts, manage projects and work with sales to build client base.	someone	someone	1	MIXED
Do you know someone who was mobbed and treated badly at his or her workplace?	someone	anyone	1	QU
There is something missing in my life although it is never too late to make a change, right?	something	something	1	QU
You can't change the fact or do anything with it.	anything	anything	1	DN
if someone see to violent movie with children, you should stop to someone.	someone	anyone	0.5914	CD
Do you know someone who did or had this kind of discrimination?	someone	anyone	0.7957	QU
If you are invited bring something light but avoid the food and the drink.	something	something	0.8105	CD
According to me, that I am a student and so I'm really concerned about this, only learning a fact without learning something from it it's unuseful, as students aren't memory machine but they have also emotions and some facts can touch them.	something	something	0.5995	MIXED
Sneakers for sister Shirts for you Shoes for the school Sweater for the winter Belt for you pants Pants for the work T-shirt for the party Do I buy something for your family?	something	something	0.8232	QU
Unfortunately I don't play anyone instrument, but I like to listen every instruments.	anyone	other	0.5956	DN
Best than anyone you know my dreams, I write you for tell you and my parents I'm really happy studying now in Colombia, it's always been my dream.	anyone	anyone	0.6064	CP
Because, if a violent actor do something violent, a child can think	something	something	0.595	CD
And if someone asks us how things are going overall, we're going to try to be mindful to downplay a bit.	someone	someone	0.5906	CD
First of all , if one take a risk on doing something , there is a high percentage of failing it .	something	something	1	MIXED
Hi, I like to say something about the food of the restaurant, really the attention was very good , the waiter were very friendly with us.	something	something	1	MIXED
A Stupid Thief someone broke into a house from the window. But just stole some money. The police came and found some blood. The next day, the police arrested the thief in the hospital. The stole money was not enough to pay the medical charges. Such a stupid thief!	someone	someone	0.803	MIXED
A last question: If someone is exercising his rights, he may be afraid by the reaction of his employer.	someone	someone	1	CD
I promised myself that never tell anyone about this, but I can't keep the secret for any longer, do you remember when you found broken your Tablet?	anyone	anyone	1	DN
I believe that trying a new thing like entering a new business, discovering a new tool to do something brings needs inspire and it also brings inspire for other people to try other things.	something	something	1	MIXED
On the other hand if you have all your expectations from your age, then you'll be the best person in the world and enjoy your life more than anyone in the world.	anyone	anyone	1	CP
I was very anxious and I couldn't belive it myself! You have to promise not to say anything, because is the company who will make the official announcement.	anything	anything	1	DN
Jon, please, is a secret, don't tell anyone nothing about Francesca.	anyone	anyone	1	DN
If someone have any question, please contact the Office Manager Mr. Herman.	someone	anyone	1	CD
So if someone is not specialized in any field, there are chances that he will not understand the state of the art of the mathematical sciences.	someone	someone	1	CD
If someone hits a strike, then the players gets two mote shots.	someone	someone	0.6032	CD
If someone throw salt over your shoulder, will you think it's bad luck?	someone	someone	0.5972	CD
I don't believe anything about celebrities' gossip until they announced on media by themselves.	anything	anything	1	DN
I believe everyone will agree if someone say that people gives more when they are satisfied.	someone	someone	0.7954	CD
Hey Tim, Well, as you asked me to tell you a story about something that happened to me, here you go: About 4 years ago, I was traveling to Brazil by car, with my brother-in-law and a friend of his.	something	something	1	MIXED
For instance, I used to work when i did not have many lessons and I was happy that I was able to succeed in working and doing something important as an adult does, relying on my own experience.	something	something	1	MIXED
Have you practiced any type of discrimination against anyone in any places?	anyone	anyone	0.7957	QU
I don't think it will be fair if we said that young people don't give enough time to helping thier communities, because if this was true there won't be amy people who will do anything to get a good aducation and defending the Kingdom.	anything	anything	1	MIXED
How does someone want to learn facts without understanding them?	someone	anyone	0.6064	QU
There are anything more that you want to share with us about this event?	anything	anything	0.8	QU
A society will appreciate more a person, who demonstrate passion and interests in taking new challenges and facing risks, rather than someone, who does not want to improve.	someone	someone	0.8148	CP
If someone engages in unwanted non verbal conduct of a sexual nature that has the purpose of effect of violating her offensive environment, it will be or not unlawful harassment?	someone	someone	0.7941	CD
My job is tiring because I always work long hours but it is rewarding, specially because every day I can do something new and I can see the people happiness with my help.	something	something	1	MIXED
The game has 10 turns for each players If anyone had strike - it means knock down the all bottles in one shot- would have two more shots.	anyone	someone	0.5963	CD
Today they do not care that much anymore about their relatives themselves, they rather care by spending money that someone takes care about the family member.	someone	someone	1	MIXED
My trip are going well, although I've missed most of my meetings, because they canceled and didn't tell me anything!	anything	anything	1	DN
Action items: Kay answered no chance to anyone who's being bad behaviours on the floor.	anyone	someone	0.7957	MIXED
Do you think most people are aware of their rights? Do you know anyone who neglected reporting discrimination in fear of being victimized: If yes, why did that person feel that way?	anyone	anyone	0.629	QU
If they become succesful in their school, they will improve and change something in our country.	something	something	1	MIXED
If they take risks, they are more likely to encounter something that is challenging, but is interesting to them at the same time.	something	something	1	MIXED
Andreas wrote me an email last week and I felt that he was so excited and happy, but promised myself not tell anyone about this, but I'm jealous, you know, Tanja is so beautiful and intelligent girl.	anyone	anyone	1	DN
Nevetheless, as much as I love Shakespeare, dedicating all my academic existence to him and him only would give me the impression of missing something. Some students learn only facts, while others are able to understand the ideas and the concepts that derive from those facts.	something	something	1	MIXED
The police hardly gave fines or put anyone in the jail.	anyone	anyone	0.7957	DN
Are there anyone who tell you uncomfortable question regarding sexual issues?	anyone	anyone	1	QU
